# Subject Index

- abdominal-A**  
 parasegmental control of *abd-A* and *Abd-B* expression:  
 SÁNCHEZ-HERRERO 437
- Abdominal-B**  
 expression in *Drosophila*: BOULET AND OTHERS 393  
 parasegmental control of *abd-A* and *Abd-B* expression:  
 SÁNCHEZ-HERRERO 437
- Abnormal development**  
*v-src* expression in chimeric mice: BOULTER AND OTHERS  
 357
- Acidic fibroblast growth factor**  
 gene expression during chick neural development:  
 SCHNÜRCH AND RISAU 1143  
 mRNAs downregulated during myogenic differentiation:  
 MOORE AND OTHERS 741
- Acrosin**  
 proacrosin binding to the zona pellucida: URCH AND PATEL  
 1165
- Actin**  
 sarcomeric  
 $\alpha$ -actin mRNA and protein in mouse embryonic muscle:  
 LYONS AND OTHERS 451
- Activin**  
 inducing factors and bird embryogenesis: COOKE AND WONG  
 197
- Adherens junction**  
 EP-cadherin in *Xenopus*: GINSBERG AND OTHERS 315
- Adhesion**  
 cell  
 differential expression of cadherins in *Xenopus*: ANGRES  
 AND OTHERS 829  
 E-cadherin distribution in *Xenopus*: LEVI AND OTHERS  
 159  
 EP-cadherin in *Xenopus*: GINSBERG AND OTHERS 315  
 proacrosin binding to the zona pellucida: URCH AND  
 PATEL 1165  
 T-cadherin expression in avian caudal somite: RANSCHT  
 AND BRONNER-FRASER 15
- aFGF (See acidic fibroblast growth factor)**
- AHox1**  
 gene  
 expression in *Halocynthia roretzi*: SAIGA AND OTHERS 821
- Amniote**  
 development  
 inducing factors and bird embryogenesis: COOKE AND  
 WONG 197
- Androgen**  
 receptor  
 seminal vesicle induction in adult epithelia: CUNHA AND  
 OTHERS 145
- Angiogenesis**  
 avian endocardial assembly: NODEN 867  
 expression of aFGF gene during chick neural  
 development: SCHNÜRCH AND RISAU 1143  
 mitogenic activity of chorioallantoic fluid related to FGFs:  
 FLAMME AND OTHERS 683
- Anterior-like cell**  
 analysis of culmination in *Dictyostelium*: JERMYN AND  
 WILLIAMS 779
- Antibody**  
 monoclonal  
 expression of Muller glia specific antigen:  
 SCHLOSSHAUER AND OTHERS 789
- staining  
 $\alpha$ -actin mRNA and protein in mouse embryonic muscle:  
 LYONS AND OTHERS 451
- Antigen**  
 nervous-system-specific in grasshopper: SEAVER AND  
 OTHERS 881
- Antisense**  
*in vivo* depletion of cyclin B mRNA: WEEKS AND OTHERS  
 1173
- Anural development**  
 localization of a cytoskeletal protein in ascidian eggs:  
 SWALLA AND OTHERS 425
- Apical cell**  
 shape regulation in *Drosophila* imaginal leg discs: CONDIC  
 AND OTHERS 23
- Apical constriction**  
 cytoplasmic myosin in *Drosophila* development: YOUNG  
 AND OTHERS 1
- Argininosuccinate lyase**  
 expression and  $\delta$  crystallin: DE POMERAI AND OTHERS 181
- armidillo**  
 interaction with *wingless* in *Drosophila*: PEIFER AND  
 OTHERS 1029
- Ascidian egg**  
 localization of a cytoskeletal protein: SWALLA AND OTHERS  
 425
- Ascidian gene**  
 expression of AHox1 in *Halocynthia roretzi*: SAIGA AND  
 OTHERS 821
- ASL (See argininosuccinate lyase)**
- Astroglia**  
 development of oligodendroglial progenitors in rat  
 forebrain: HARDY AND REYNOLDS 1061
- Avian embryo**  
 colonization of post-umbilical bowel by sacral neural crest:  
 POMERANZ AND OTHERS 647  
 proteoglycans in avian neural crest development: PERRIS  
 AND OTHERS 583
- Axis**  
 dorsal-ventral  
 cytoplasmic movements in *Xenopus* egg: DANILCHIK &  
 DENEGRE 845  
 specification  
*NvHbox 2* homeobox gene in newt limb blastema:  
 BROWN AND BROCKES 489
- Axon**  
 outgrowth  
 nervous-system-specific antigen in grasshopper: SEAVER  
 AND OTHERS 881  
 subset  
 nervous-system-specific antigen in grasshopper: SEAVER  
 AND OTHERS 881
- Axonogenesis**  
 nervous-system-specific antigen in grasshopper: SEAVER  
 AND OTHERS 881
- Basic fibroblast growth factor**  
 bFGF and TGF- $\beta$ 1 influence melanogenesis: STOCKER AND  
 OTHERS 635  
 mitogenic activity of chorioallantoic fluid related to FGFs:  
 FLAMME AND OTHERS 683  
 mRNAs downregulated during myogenic differentiation:  
 MOORE AND OTHERS 741

**Bithorax complex**

- expression of *Drosophila Abd-B* gene: BOULET AND OTHERS 393
- parasegmental control of *abd-A* and *Abd-B* expression: SÁNCHEZ-HERRERO 437
- upstream control region of *Ultrabithorax*: IRVINE AND OTHERS 407

**Blastula**

- Xenopus*
- single cell analysis of mesoderm formation: GODSAVE AND SLACK 523

**Body**

- pattern formation
- inducing factors and bird embryogenesis: COOKE AND WONG 197

**Bone Morphogenetic Protein-4 (BMP-4)**

- and *Vgr-1* in mouse neurogenesis: JONES AND OTHERS 531

**Brain**

- gap junctions in chick facial primordia and brain: MINKOFF AND OTHERS 509
- rat
- IGF-I and IGF-II mRNA in the fetus: AYER-LE LIEVRE AND OTHERS 105

**Branching morphogenesis**

- of mouse salivary gland in transfilter culture: TAKAHASHI AND NOGAWA 327

**Brassica napus**

- storage protein mRNAs in meristems: FERNANDEZ AND OTHERS 299

**BrdU**

- origin of *Drosophila* postembryonic neuroblasts: PROKOP AND TECHNAU 79

**Cadherin**

- E-cadherin distribution in *Xenopus*: LEVI AND OTHERS 159
- EP-cadherin in *Xenopus*: GINSBERG AND OTHERS 315
- expression
- alternates with migrating neural crest in avian caudal somite: RANSCHT AND BRONNER-FRASER 15
- Xenopus laevis*
- differential expression: ANGRES AND OTHERS 829

**Caenorhabditis elegans**

- embryonic body wall muscle attachments require *mup-1* gene: GOH AND BOGAERT 667
- tail region
- control of cell fate by *egl-5*: CHISHOLM 921

**Calcium**

- dependent interaction
- E-cadherin distribution in *Xenopus*: LEVI AND OTHERS 159

**Carbonic anhydrase III**

- transcripts in mouse embryos: LYONS AND OTHERS 233

**Cardiogenesis**

- TGF  $\beta$  gene expression in mouse embryos: MILLAN AND OTHERS 131

**Cartilage**

- mouse
- $\alpha 1$ (II) collagen gene expression: CHEAH AND OTHERS 945
- NG2 proteoglycan in developing rat limb: NISHIYAMA AND OTHERS 933

**Cell**

- ablation, selective
- positional cues and cell migration in leech: TORRENCE 993
- adhesion
- differential expression of cadherins in *Xenopus*: ANGRES AND OTHERS 829

EP-cadherin in *Xenopus*: GINSBERG AND OTHERS 315

proacrosin binding to the zona pellucida: URCH AND PATEL 1165

T-cadherin expression in avian caudal somite: RANSCHT AND BRONNER-FRASER 15

**-cell adhesion**

E-cadherin distribution in *Xenopus*: LEVI AND OTHERS 159

**commitment**

positional cues and cell migration in leech: TORRENCE 993

**communication**

gap junctions in chick facial primordia and brain: MINKOFF AND OTHERS 509

**culture**

development of oligodendroglial progenitors in rat forebrain: HARDY AND REYNOLDS 1061

**cycle**

cytoplasmic movements in *Xenopus* egg: DANILCHIK AND DENEGRE 845

*in vivo* depletion of cyclin B mRNA: WEEKS AND OTHERS 1173

parthenogenetic mouse embryos produced by inhibition of 1st meiotic cleavage: KUBIAK AND OTHERS 763

**death**

*c-fos* expression during keratinization: FISHER AND OTHERS 253

**fate**

regional control in *C. elegans* by *egl-5*: CHISHOLM 921

sensillum development requires *Hairless* in *Drosophila*: BANG AND OTHERS 89

**fusion**

nuclear-cytoplasmic interaction in ovine oocyte maturation: SUN AND MOOR 171

**lineage**

bFGF and TGF- $\beta 1$  influence melanogenesis: STOCKER AND OTHERS 635

control of cell fate in *C. elegans* by *egl-5*: CHISHOLM 921

of maize shoot, effect of *Teopod2* mutation: DUDLEY AND POETHIG 733

origin of postembryonic neuroblasts: PROKOP AND TECHNAU 79

positional cues and cell migration in leech: TORRENCE 993

**migration**

and positional cues in leech: TORRENCE 993

colonization of post-umbilical bowel by sacral neural crest: POMERANZ AND OTHERS 647

proteoglycans in avian neural crest development: PERRIS AND OTHERS 583

sacral neural crest contribution to enteric nervous system: SERBEDZIJA AND OTHERS 857

T-cadherin expression in avian caudal somite: RANSCHT AND BRONNER-FRASER 15

**polarity**

differential expression of cadherins in *Xenopus*: ANGRES AND OTHERS 829

**proliferation**

and transcription of nuclear oncogenes during feather morphogenesis: DESBIENS AND OTHERS 699

**shape**

change, cytoplasmic myosin in *Drosophila* development: YOUNG AND OTHERS 1

changes in *Drosophila* imaginal leg discs: CONDIC AND OTHERS 23

**stem**

primitive erythropoiesis: MIWA AND OTHERS 543

- surface  
developmental expression of syndecan: TRAUTMAN AND OTHERS 213
- types  
analysis of culmination in *Dictyostelium*: JERMYN AND WILLIAMS 779
- Cellularization**  
cytoplasmic myosin in *Drosophila* development: YOUNG AND OTHERS 1
- Cellular retinoic acid-binding protein (CRABP)**  
and retinoic acid receptors: RUBERTE AND OTHERS 45  
rhombomeres and neural crest: MADEN AND OTHERS 35
- Cellular retinoid binding protein (CRBP)**  
and retinoic acid receptors: RUBERTE AND OTHERS 45
- Central nervous system**  
*En* proteins in mouse, chick and frog embryos: DAVIS AND OTHERS 287  
retinoic acid receptor beta in chick embryo: SMITH AND EICHELE 245  
*Vgr-1* and *Bone Morphogenetic Protein-4* in mouse neurogenesis: JONES AND OTHERS 531
- Centrosome**  
roles in organizing *Drosophila* cytoskeleton: YASUDA AND OTHERS 379
- Cephalic expression**  
and characterization of *Xenopus En-2*: HEMMATI-BRIVANLOU AND OTHERS 715
- c-ets**  
expression  
and cell proliferation during feather morphogenesis: DESBIENS AND OTHERS 699
- c-fos**  
expression during keratinization: FISHER AND OTHERS 253
- Chick**  
embryo  
*En* proteins in mouse, chick and frog embryos: DAVIS AND OTHERS 287  
gap junctions in facial primordia and brain: MINKOFF AND OTHERS 509  
mitogenic activity of chorioallantoic fluid related to CAM and FGF: FLAMME AND OTHERS 683  
RAR- $\beta$  gene expression in face development: ROWE AND OTHERS 1007  
retinoic acid receptor beta: SMITH AND EICHELE 245  
sacral neural crest contribution to enteric nervous system: SERBEDZIJA AND OTHERS 857  
spatial and temporal distribution of polarizing activity: HORNBRUCH AND WOLPERT 725  
T-cadherin expression in avian caudal somite: RANSCHT AND BRONNER-FRASER 15
- heart  
endocardial assembly: NODEN 867
- neural crest  
lineage, analysis with retrovirus: FRANK AND SANES 895
- neural development  
expression of aFGF gene: SCHNÜRCH AND RISAU 1143
- peripheral nervous system  
RXR nuclear receptor expressed in neural-crest-derived cells: ROWE AND OTHERS 771
- quail chimaera  
avian endocardial assembly: NODEN 867
- spinal cord  
muscle enhances motoneuron survival: BLOCH-GALLEGO AND OTHERS 221
- tibiotarsus  
mRNA and protein analyses: LINSENMAYER AND OTHERS 191
- Chimera**  
mouse  
embryonic stem cells from 413.d mutant mouse embryos: CONLON AND OTHERS 969
- mouse-rat  
seminal vesicle induction in adult epithelia: CUNHA AND OTHERS 145
- quail-chick  
avian endocardial assembly: NODEN 867
- Chondrogenesis**  
 $\alpha 1$ (II) collagen gene expression in mouse: CHEAH AND OTHERS 945  
collagen type II expression in mouse craniofacial development: WOOD AND OTHERS 955
- Chondroitin sulphate**  
developmental expression of syndecan: TRAUTMAN AND OTHERS 213
- Chorioallantoic membrane**  
mitogenic activity of chorioallantoic fluid related to FGFs: FLAMME AND OTHERS 683
- Chromatin**  
condensation  
nuclear-cytoplasmic interaction in ovine oocyte maturation: SUN AND MOOR 171  
 $\delta$  crystallin and argininosuccinate lyase expression: DE POMERAI AND OTHERS 181
- Chromosome**  
imprinting  
paternal expression of *Pgk-1* in transgenic mice: PRAVTCHEVA AND OTHERS 1109
- X  
parental origin and survival of XO mouse fetuses: HUNT 1137
- Ciliary neurotrophic factor**  
muscle enhances motoneuron survival: BLOCH-GALLEGO AND OTHERS 221
- cis**  
regulation  
imaginal disk expression of *decapentaplegic* in *Drosophila*: BLACKMAN AND OTHERS 657  
regulatory element  
expression of *Drosophila Abd-B* gene: BOULET AND OTHERS 393  
parasegmental control of *abd-A* and *Abd-B* expression: SÁNCHEZ-HERRERO 437  
upstream control region of *Ultrabithorax*: IRVINE AND OTHERS 407
- Cleavage**  
cytoplasmic movements in *Xenopus* egg: DANILCHIK & DENEGRE 845  
embryo  
mutants affecting F-actin in *Drosophila*: HATANAKA AND OKADA 909
- Clonal analysis**  
of mesoderm formation in *Xenopus* blastula: GODSAVE AND SLACK 523
- c-myb**  
expression  
and cell proliferation during feather morphogenesis: DESBIENS AND OTHERS 699
- c-myc**  
expression  
and cell proliferation during feather morphogenesis: DESBIENS AND OTHERS 699

**Collagen**

## genes

differential expression during tooth development:  
ANDUJAR AND OTHERS 691

## type II

expression in mouse: CHEAH AND OTHERS 945  
expression in mouse craniofacial development: WOOD  
AND OTHERS 955

## types IX and X

mRNA in developing chick tibiotarsus: LINSENMEYER  
AND OTHERS 191

## type VI

NG2 proteoglycan in developing rat limb: NISHIYAMA  
AND OTHERS 933

 **$\alpha 1(\text{II})$ : collagen gene**

expression in mouse: CHEAH AND OTHERS 945

**Commitment**

## cell

positional cues and cell migration in leech: TORRENCE  
993

**Communication**

## cell

gap junctions in chick facial primordia and brain:  
MINKOFF AND OTHERS 509

**Constriction**

## apical

cytoplasmic myosin in *Drosophila* development: YOUNG  
AND OTHERS 1

**CpG island**

isolation of testis-specific gene from mouse t-complex:  
MAZARAKIS AND OTHERS 561

**CRABP I**

and retinoic acid receptors: RUBERTE AND OTHERS 45

**CRABP (See cellular retinoic acid-binding protein)****Craniofacial development**

*Hox 7.1* expression in tooth development: MACKENZIE AND  
OTHERS 269

## mouse

collagen type II expression: WOOD AND OTHERS 955  
retinoic acid receptor beta in chick embryo: SMITH AND  
EICHELE 245

**Craniofacial region**

IGF-I and IGF-II mRNA in the rat fetus: AYER-LE LIEVRE  
AND OTHERS 105

**CRBP I**

and retinoic acid receptors: RUBERTE AND OTHERS 45

**Cross-regulation**

interactions between *giant* and *Kruppel* in *Drosophila*:  
KRAUT AND LEVINE 611

**Cruciferin**

storage protein mRNAs in meristems of *Brassica*:  
FERNANDEZ AND OTHERS 299

 **$\delta$ -crystallin**

and argininosuccinate lyase expression: DE POMERAI AND  
OTHERS 181

**Culmination**

analysis in *Dictyostelium*: JERMYN AND WILLIAMS 779

**Culture***in vitro*

expression of Muller glia specific antigen:  
SCHLOSSHAUER AND OTHERS 789

**Cycle**

## cell

cytoplasmic movements in *Xenopus* egg: DANILCHIK AND  
DENEGRE 845  
*in vivo* depletion of cyclin B mRNA: WEEKS AND OTHERS  
1173

## hair growth

TIMP localization in cycling mouse hair: KAWABE AND  
OTHERS 877

**Cyclin**

*in vivo* depletion of cyclin B mRNA: WEEKS AND OTHERS  
1173

**Cytochalasin**

mutants affecting F-actin in *Drosophila*: HATANAKA AND  
OKADA 909

**Cytochalasin D**

parthenogenetic mouse embryos produced by inhibition of  
1st meiotic cleavage: KUBIAK AND OTHERS 763

**Cytoplasmic localization**

in *Xenopus* egg: DANILCHIK AND DENEGRE 845  
of a cytoskeletal protein in ascidian eggs: SWALLA AND  
OTHERS 425

**Cytoplasmic myosin**

in *Drosophila* development: YOUNG AND OTHERS 1

**Cytoskeleton***Drosophila*

roles of centrosomes and DNA: YASUDA AND OTHERS 379  
localization of a protein in ascidian eggs: SWALLA AND  
OTHERS 425

**Death**

## cell

*c-fos* expression during keratinization: FISHER AND  
OTHERS 253

**decapentaplegic**

imaginal disk expression in *Drosophila*: BLACKMAN AND  
OTHERS 657

**Dermomyotome**

early expression of myogenic factor, *myf-5*: OTT AND  
OTHERS 1097

***Dictyostelium discoideum***

analysis of culmination: JERMYN AND WILLIAMS 779

**dil**

colonization of post-umbilical bowel by sacral neural crest:  
POMERANZ AND OTHERS 647

sacral neural crest contribution to enteric nervous system:  
SERBEDZIJIA AND OTHERS 857

**Distal inversion**

isolation of testis-specific gene from mouse t-complex:  
MAZARAKIS AND OTHERS 561

**6-DMAP**

tyrosine phosphorylation in *Xenopus* oocyte: JESSUS AND  
OTHERS 813

**DNA**

## methylation

imprinting and heritable methylation: SASAKI AND  
OTHERS 573

role in organizing *Drosophila* cytoskeleton: YASUDA AND  
OTHERS 379

**Dorsal-ventral axis**

cytoplasmic movements in *Xenopus* egg: DANILCHIK AND  
DENEGRE 845

**Dorsal-ventral pattern**

*Toll* protein in *Drosophila* embryo: HASHIMOTO AND  
OTHERS 1021

**Doublet**

cellular handedness in *Stylonychia*: SHI AND OTHERS 337

***Drosophila***

## embryo

cytoplasmic myosin in development: YOUNG AND OTHERS  
1  
dynamic expression of *snail*: ALBERGA AND OTHERS 983

- interactions between *giant* and *Kruppel* in *Drosophila*:  
KRAUT AND LEVINE 611
- mutants affecting F-actin: HATANAKA AND OKADA 909
- parasegmental control of *abd-A* and *Abd-B* expression:  
SÁNCHEZ-HERRERO 437
- roles of centrosomes and DNA in organizing  
cytoskeleton: YASUDA AND OTHERS 379
- spatial regulation of *giant*: KRAUT AND LEVINE 601
- Toll* protein: HASHIMOTO AND OTHERS 1021
- gene expression
- mis-regulating segmentation gene expression:  
PARKHURST AND ISH-HOROWICZ 1121
- genes
- decapentaplegic* – imaginal disk expression: BLACKMAN  
AND OTHERS 657
- homeotic gene
- expression of *Abd-B* gene: BOULET AND OTHERS 393
- upstream control region of *Ultrabithorax*: IRVINE AND  
OTHERS 407
- imaginal disc
- apical cell shape changes: CONDIC AND OTHERS 23
- neurogenesis
- origin of postembryonic neuroblasts: PROKOP AND  
TECHNAU 79
- segmentation
- interactions of *giant* with maternal and zygotic genes:  
ELDON AND PIRROTTA 367
- segment polarity genes
- interaction of *armadillo* with *wingless*: PEIFER AND  
OTHERS 1029
- sensory organ
- requires *Hairless*: BANG AND OTHERS 89
- Serrate*
- encodes EGF-like transmembrane protein: THOMAS AND  
OTHERS 749
- wing disc
- sense organs: HUANG AND OTHERS 1087
- Ectoderm**
- developmental expression of syndecan: TRAUTMAN AND  
OTHERS 213
- Xenopus*
- hatching gland development and relationship to surface  
ectoderm patterning: DRYSDALE AND ELINSON 469
- EGF-like protein**
- encoded by *Drosophila Serrate*: THOMAS AND OTHERS 749
- Egg**
- Xenopus*
- cytoplasmic movements: DANILCHIK AND DENEGRE 845
- Embryonic stem cell (ES)**
- from 413.d mutant mouse embryos: CONLON AND OTHERS  
969
- in vitro* hematopoietic differentiation: WILES AND KELLER  
259
- En-2**
- Xenopus*
- cephalic expression and molecular characterization:  
HEMMATI-BRIVANLOU AND OTHERS 715
- Endoderm**
- mouse
- endodermal origin of yolk-sac-derived teratomas: SOBIS  
AND OTHERS 75
- engrailed**
- cephalic expression and characterization of *Xenopus En-2*:  
HEMMATI-BRIVANLOU AND OTHERS 715
- Enhancer element**
- imaginal disk expression of *decapentaplegic* in *Drosophila*:  
BLACKMAN AND OTHERS 657
- Enteric nervous system**
- chick and mouse
- sacral neural crest contribution: SERBEDZIJA AND OTHERS  
857
- colonization of post-umbilical bowel by sacral neural crest:  
POMERANZ AND OTHERS 647
- Enucleation**
- nuclear–cytoplasmic interaction in ovine oocyte  
maturation: SUN AND MOOR 171
- Epithelia**
- c-fos* expression during keratinization: FISHER AND OTHERS  
253
- E-cadherin distribution in *Xenopus*: LEVI AND OTHERS 159
- TGF  $\beta$  gene expression in mouse embryos: MILLAN AND  
OTHERS 131
- Epithelial–mesenchymal interaction**
- developmental expression of syndecan: TRAUTMAN AND  
OTHERS 213
- Hox 7.1* expression in tooth development: MACKENZIE AND  
OTHERS 269
- Erythropoiesis**
- of teratocarcinoma stem cells: MIWA AND OTHERS 543
- Erythropoietin**
- in vitro* hematopoietic differentiation of ES cells: WILES  
AND KELLER 259
- ES (See Embryonic stem cell)**
- Evi-1**
- expression in mouse development: PERKINS AND OTHERS  
479
- Expression**
- $\alpha 1$ (II) collagen gene in mouse: CHEAH AND OTHERS 945
- collagen type II
- in mouse craniofacial development: WOOD AND OTHERS  
955
- EP-cadherin in *Xenopus*: GINSBERG AND OTHERS 315
- gene
- of aFGF during chick neural development: SCHNÜRCH  
AND RISAU 1143
- of AHox1 in *Halocynthia roretzi*: SAIGA AND OTHERS 821
- of FGF receptor in rat: WANAKA AND OTHERS 455
- Hox 7.1*
- in tooth development: MACKENZIE AND OTHERS 269
- Hox 1.6* and *Hox 2.9* in mouse: MURPHY AND HILL 61
- IGF-I and IGF-II mRNA in the rat fetus: AYER-LE LIEVRE  
AND OTHERS 105
- nuclear oncogenes
- and cell proliferation during feather morphogenesis:  
DESBIENS AND OTHERS 699
- NvHbox 2* homeobox gene in newt limb blastema: BROWN  
AND BROCKES 489
- of syndecan: TRAUTMAN AND OTHERS 213
- of TGF  $\beta$  genes in mouse embryogenesis: SCHMID AND  
OTHERS 117
- of TGF  $\beta$ , regulation by retinoic acid in vitamin A-  
deficient rat: GLICK AND OTHERS 1081
- RAR- $\beta$  gene
- in chick face development: ROWE AND OTHERS 1007
- segmentation gene
- mis-regulation in *Drosophila*: PARKHURST AND ISH-  
HOROWICZ 1121
- T-cadherin
- alternates with migrating neural crest in avian caudal  
somite: RANSCHT AND BRONNER-FRASER 15

## 1200 Subject Index

- temporal and spatial
  - nervous-system-specific antigen in grasshopper: SEAVER AND OTHERS 881
  - TGF  $\beta$  genes in mouse embryos: MILLAN AND OTHERS 131
  - v-src* in chimeric mice: BOULTER AND OTHERS 357
- Extracellular matrix**
  - proteoglycans in avian neural crest development: PERRIS AND OTHERS 583
- Facial primordia**
  - RAR- $\beta$  gene expression in chick face development: ROWE AND OTHERS 1007
- F-actin**
  - mutants affecting F-actin in *Drosophila*: HATANAKA AND OKADA 909
- Feather**
  - morphogenesis
    - cell proliferation and transcription of nuclear oncogenes: DESBIENS AND OTHERS 699
- Fertilization**
  - proacrosin binding to the zona pellucida: URCH AND PATEL 1165
  - sea urchin
    - unmasking of stored maternal mRNAs: KELSO-WINEMILLER AND WINKLER 623
  - sperm acrosin-zona pellucida interactions: JONES 1155
- FGF**
  - and TGF- $\beta$ 1 influence melanogenesis: STOCKER AND OTHERS 635
  - developmental expression of receptor mRNA in rat: WANAKA AND OTHERS 455
  - inducing factors and bird embryogenesis: COOKE AND WONG 197
  - mRNAs downregulated during myogenic differentiation: MOORE AND OTHERS 741
  - receptor
    - mRNAs downregulated during myogenic differentiation: MOORE AND OTHERS 741
- Fibroblast growth factor**
  - and TGF- $\beta$ 1 influence melanogenesis: STOCKER AND OTHERS 635
  - developmental expression of receptor mRNA in rat: WANAKA AND OTHERS 455
  - gene expression during chick neural development: SCHNÜRCH AND RISAU 1143
  - inducing factors and bird embryogenesis: COOKE AND WONG 197
  - mitogenic activity of chorioallantoic fluid related to FGFs: FLAMME AND OTHERS 683
  - muscle enhances motoneuron survival: BLOCH-GALLEGO AND OTHERS 221
  - single cell analysis of mesoderm formation in *Xenopus* blastula: GODSAVE AND SLACK 523
- Fibronectin**
  - inducing factors and bird embryogenesis: COOKE AND WONG 197
- Finger protein**
  - dynamic expression of *snail* in *Drosophila*: ALBERGA AND OTHERS 983
- Follicle cell**
  - XY in mouse mosaic ovaries: PALMER AND BURGOYNE 1017
- Forebrain**
  - rat
    - development of oligodendroglial progenitors: HARDY AND REYNOLDS 1061
- Fucoidan**
  - proacrosin binding to the zona pellucida: URCH AND PATEL 1165
  - sperm acrosin-zona pellucida interactions: JONES 1155
- Fusion**
  - cell
    - nuclear-cytoplasmic interaction in ovine oocyte maturation: SUN AND MOOR 171
  - gene,  $\beta$ -galactosidase
    - analysis of culmination in *Dictyostelium*: JERMYN AND WILLIAMS 779
- $\beta$ -galactosidase**
  - fusion genes
    - analysis of culmination in *Dictyostelium*: JERMYN AND WILLIAMS 779
  - neural crest lineage in chick: FRANK AND SANES 895
  - TIMP localization in cycling mouse hair: KAWABE AND OTHERS 877
- Gap**
  - gene
    - interactions between *giant* and *Kruppel* in *Drosophila*: KRAUT AND LEVINE 611
    - interactions of *giant* with maternal and zygotic genes: ELDON AND PIRROTTA 367
    - spatial regulation of *giant* during *Drosophila* development: KRAUT AND LEVINE 601
  - junctions
    - in chick facial primordia and brain: MINKOFF AND OTHERS 509
- Gastrulation**
  - Drosophila*
    - cytoplasmic myosin in development: YOUNG AND OTHERS 1
    - inducing factors and bird embryogenesis: COOKE AND WONG 197
- Gene**
  - AHox1
    - expression in *Halocynthia roretzi*: SAIGA AND OTHERS 821
  - $\beta$ -galactosidase fusion
    - analysis of culmination in *Dictyostelium*: JERMYN AND WILLIAMS 779
  - collagen
    - differential expression during tooth development: ANDUJAR AND OTHERS 691
  - En-2*
    - cephalic expression and molecular characterization: HEMMATI-BRIVANLOU AND OTHERS 715
  - expression
    - mis-regulation in *Drosophila*: PARKHURST AND ISH-HOROWICZ 1121
    - of aFGF during chick neural development: SCHNÜRCH AND RISAU 1143
    - of AHox1 in *Halocynthia roretzi*: SAIGA AND OTHERS 821
    - of FGF receptor in rat: WANAKA AND OTHERS 455
    - RAR- $\beta$  expression in chick face development: ROWE AND OTHERS 1007
    - TGF  $\beta$  in mouse embryos: MILLAN AND OTHERS 131
  - giant*
    - interactions with maternal and zygotic genes: ELDON AND PIRROTTA 367
  - homeobox
    - expression in *Xenopus*: SU AND OTHERS 1179
  - interactions between *giant* and *Kruppel* in *Drosophila*: KRAUT AND LEVINE 611

- mup-1*  
embryonic body wall muscle attachments in *C. elegans*:  
GOH AND BOGAERT 667
- NvHbox 2* in newt limb blastema: BROWN AND BROCKES 489
- pair-rule  
mis-regulating segmentation gene expression in  
*Drosophila*: PARKHURST AND ISH-HOROWICZ 1121
- regulatory  
early expression of myogenic factor, *myf-5*: OTT AND  
OTHERS 1097
- segment polarity  
interaction of *armadillo* with *wingless* in *Drosophila*:  
PEIFER AND OTHERS 1029
- spatial regulation of *giant* during *Drosophila* development:  
KRAUT AND LEVINE 601
- testis-specific  
isolation from distal inversion of the mouse *t*-complex:  
MAZARAKIS AND OTHERS 561
- Genetic redundancy**  
mis-regulating segmentation gene expression in  
*Drosophila*: PARKHURST AND ISH-HOROWICZ 1121
- Genomic imprinting**  
and heritable methylation: SASAKI AND OTHERS 573  
parental origin and survival of XO mouse fetuses: HUNT  
1137
- Germ**  
layers  
dynamic expression of *snail* in *Drosophila*: ALBERGA  
AND OTHERS 983
- giant***  
interactions between *giant* and *Kruppel* in *Drosophila*:  
KRAUT AND LEVINE 611  
interactions with maternal and zygotic genes: ELDON AND  
PIRROTTA 367  
spatial regulation during *Drosophila* development: KRAUT  
AND LEVINE 601
- Glia**  
chick  
neural crest lineage: FRANK AND SANES 895
- Glucose-6-phosphate dehydrogenase**  
endodermal origin of yolk-sac-derived teratomas: SOBIS  
AND OTHERS 75
- Gradient**  
interactions between *giant* and *Kruppel* in *Drosophila*:  
KRAUT AND LEVINE 611
- Grasshopper**  
embryo  
nervous-system-specific antigen: SEAVER AND OTHERS 881
- Growth**  
factor  
bFGF and TGF- $\beta$ 1 influence melanogenesis: STOCKER  
AND OTHERS 635  
expression of aFGF gene during chick neural  
development: SCHNÜRCH AND RISAU 1143  
inducing factors and bird embryogenesis: COOKE AND  
WONG 197  
mitogenic activity of chorioallantoic fluid related to  
FGFs: FLAMME AND OTHERS 683  
muscle enhances motoneuron survival: BLOCH-GALLEGO  
AND OTHERS 221  
role of *Xwnt-8* in pattern formation in *Xenopus*:  
CHRISTIAN AND OTHERS 1045  
single cell analysis of mesoderm formation in *Xenopus*  
blastula: GODSAVE AND SLACK 523  
TGF  $\beta$  gene expression in mouse embryos: MILLAN AND  
OTHERS 131
- TGF  $\beta$  gene expression in mouse embryos: SCHMID AND  
OTHERS 117
- Gut**  
chick and mouse  
sacral neural crest contribution to enteric nervous  
system: SERBEDZIJIA AND OTHERS 857
- Hair**  
mouse  
localization in cycling mouse hair: KAWABE AND OTHERS  
877
- Hairless**  
and sensillum development in *Drosophila*: BANG AND  
OTHERS 89
- Halocynthia roretzi***  
embryo  
molecular cloning and expression of AHox1: SAIGA AND  
OTHERS 821
- Hatching gland**  
*Xenopus*  
development and relationship to surface ectoderm  
patterning: DRYSDALE AND ELINSON 469
- H $\beta$ 58**  
an insertional mutation in mouse: RADICE AND OTHERS 801
- Head**  
*Drosophila*  
interactions of *giant* with maternal and zygotic genes:  
ELDON AND PIRROTTA 367
- Heart**  
chick  
endocardial assembly: NODEN 867  
*Vgr-1* and *Bone Morphogenetic Protein-4* in mouse  
neurogenesis: JONES AND OTHERS 531
- Helix-loop-helix protein**  
*Xenopus Myf-5*: HOPWOOD AND OTHERS 551
- Hematopoietic lineage**  
from ES cells *in vitro*: WILES AND KELLER 259
- Heparan sulphate**  
developmental expression of syndecan: TRAUTMAN AND  
OTHERS 213
- Heparin-binding growth factors**  
mitogenic activity of chorioallantoic fluid related to FGFs:  
FLAMME AND OTHERS 683
- Hermaphrodite**  
XY follicle cells in mouse mosaic ovaries: PALMER AND  
BURGOYNE 1017
- Heterochronic mutation**  
*Teopod2*  
effect on cell lineage of maize shoot: DUDLEY AND  
POETHIG 733
- Hindbrain**  
gene expression  
*labial*-like genes in mouse: MURPHY AND HILL 61
- Hindgut**  
avian  
colonization of post-umbilical bowel by sacral neural  
crest: POMERANZ AND OTHERS 647
- Homeobox**  
CRABP, rhombomeres and neural crest: MADEN AND  
OTHERS 35  
*En* proteins in mouse, chick and frog embryos: DAVIS AND  
OTHERS 287  
expression in *Xenopus*: SU AND OTHERS 1179  
expression of AHox1 in *Halocynthia roretzi*: SAIGA AND  
OTHERS 821

- Hox 7.1* expression in tooth development: MACKENZIE AND OTHERS 269
- labial*-like genes in mouse: MURPHY AND HILL 61
- parasegmental control of *abd-A* and *Abd-B* expression: SÁNCHEZ-HERRERO 437
- regeneration-specific gene in newt limb blastema: BROWN AND BROCKES 489
- Homozygous lethal**
- embryonic stem cells from 413.d mutant mouse embryos: CONLON AND OTHERS 969
- Hox 1.6***
- labial*-like genes in mouse: MURPHY AND HILL 61
- Hox-2.9***
- CRABP, rhombomeres and neural crest: MADEN AND OTHERS 35
- labial*-like genes in mouse: MURPHY AND HILL 61
- Hox 7.1***
- expression in tooth development: MACKENZIE AND OTHERS 269
- hunchback***
- mis-regulating segmentation gene expression in *Drosophila*: PARKHURST AND ISH-HOROWICZ 1121
- Hyaluronan**
- in avian neural crest development: PERRIS AND OTHERS 583
- Hybridization**
- in situ*
- $\alpha$ -actin mRNA and protein in mouse embryonic muscle: LYONS AND OTHERS 451
- $\alpha 1$ (II) collagen gene expression in mouse: CHEAH AND OTHERS 945
- carbonic anhydrase transcripts in mouse embryos: LYONS AND OTHERS 233
- collagen X mRNA in developing chick tibiotarsus: LINSENMAYER AND OTHERS 191
- early expression of myogenic factor, *myf-5*: OTT AND OTHERS 1097
- expression of aFGF gene during chick neural development: SCHNÜRCH AND RISAU 1143
- expression of AHox1 in *Halocynthia roretzi*: SAIGA AND OTHERS 821
- expression of TGF  $\beta$  genes in mouse embryogenesis: SCHMID AND OTHERS 117
- IGF-I and IGF-II mRNA in the rat fetus: AYER-LE LIEVRE AND OTHERS 105
- retinoic acid receptor beta in chick embryo: SMITH AND EICHELE 245
- storage protein mRNAs in meristems of *Brassica*: FERNANDEZ AND OTHERS 299
- Vgr-1* and *Bone Morphogenetic Protein-4* in mouse neurogenesis: JONES AND OTHERS 531
- IGF-2**
- receptor
- in mouse development: HARVEY AND KAYE 1057
- IGF-I**
- mRNA in the rat fetus: AYER-LE LIEVRE AND OTHERS 105
- IGF-II**
- mRNA in the rat fetus: AYER-LE LIEVRE AND OTHERS 105
- Imaginal disc**
- leg
- cell shape changes in *Drosophila*: CONDIC AND OTHERS 23
- sense organs on wing disc in *Drosophila*: HUANG AND OTHERS 1087
- Imaginal disk**
- Drosophila*
- expression of *decapentaplegic*: BLACKMAN AND OTHERS 657
- Immunochemistry**
- En* proteins in mouse, chick and frog embryos: DAVIS AND OTHERS 287
- Immunofluorescence**
- E-cadherin distribution in *Xenopus*: LEVI AND OTHERS 159
- Immunohistochemistry**
- IGF-2 receptors in mouse development: HARVEY AND KAYE 1057
- Immunolocalization**
- gap junctions in chick facial primordia and brain: MINKOFF AND OTHERS 509
- Imprinting**
- chromosome
- paternal expression of *Pgk-1* in transgenic mice: PRAVTCHEVA AND OTHERS 1109
- Induction**
- seminal vesicle
- in adult epithelia: CUNHA AND OTHERS 145
- infra-abdominal* mutation**
- expression of *Drosophila Abd-B* gene: BOULET AND OTHERS 393
- Ingression**
- cytoplasmic movements in *Xenopus* egg: DANILCHIK AND DENEGRE 845
- Insect**
- nervous-system-specific antigen in grasshopper: SEAVER AND OTHERS 881
- Insertional mutation**
- H $\beta$ 58
- in mouse embryo: RADICE AND OTHERS 801
- In situ***
- hybridization
- $\alpha$ -actin mRNA and protein in mouse embryonic muscle: LYONS AND OTHERS 451
- $\alpha 1$ (II) collagen gene expression in mouse: CHEAH AND OTHERS 945
- carbonic anhydrase transcripts in mouse embryos: LYONS AND OTHERS 233
- collagen X mRNA in developing chick tibiotarsus: LINSENMAYER AND OTHERS 191
- early expression of myogenic factor, *myf-5*: OTT AND OTHERS 1097
- expression of aFGF gene during chick neural development: SCHNÜRCH AND RISAU 1143
- expression of AHox1 in *Halocynthia roretzi*: SAIGA AND OTHERS 821
- expression of TGF  $\beta$  genes in mouse embryogenesis: SCHMID AND OTHERS 117
- IGF-I and IGF-II mRNA in the rat fetus: AYER-LE LIEVRE AND OTHERS 105
- retinoic acid receptor beta in chick embryo: SMITH AND EICHELE 245
- storage protein mRNAs in meristems of *Brassica*: FERNANDEZ AND OTHERS 299
- Vgr-1* and *Bone Morphogenetic Protein-4* in mouse neurogenesis: JONES AND OTHERS 531
- Insulin-like growth factor**
- mRNA in the rat fetus: AYER-LE LIEVRE AND OTHERS 105
- Interaction**
- calcium-dependent
- E-cadherin distribution in *Xenopus*: LEVI AND OTHERS 159
- epithelial–mesenchymal
- developmental expression of syndecan: TRAUTMAN AND OTHERS 213
- Hox 7.1* expression in tooth development: MACKENZIE AND OTHERS 269



- seminal vesicle induction in adult epithelia: CUNHA AND OTHERS 145
- nuclear–cytoplasmic  
in ovine oocyte maturation: SUN AND MOOR 171
- Interleukin-3**  
*in vitro* hematopoietic differentiation of ES cells: WILES AND KELLER 259
- In vitro**  
culture  
development of oligodendroglial progenitors in rat forebrain: HARDY AND REYNOLDS 1061  
expression of Muller glia specific antigen: SCHLOSSHAUER AND OTHERS 789  
hematopoietic differentiation of ES cells: WILES AND KELLER 259
- Keratin**  
gene expression in the newt limb: FERRETTI AND OTHERS 497
- Keratinization**  
*c-fos* expression: FISHER AND OTHERS 253
- Leech**  
neurogenesis  
positional cues and cell migration: TORRENCE 993
- Leg**  
bud  
spatial and temporal distribution of polarizing activity: HORNBRUCH AND WOLPERT 725
- Lens**  
 $\delta$  crystallin and argininosuccinate lyase expression: DE POMERAI AND OTHERS 181
- Lesion**  
optic nerve  
expression of Muller glia specific antigen: SCHLOSSHAUER AND OTHERS 789
- Lethal mutation**  
embryonic stem cells from 413.d mutant mouse embryos: CONLON AND OTHERS 969
- Limb**  
bud  
spatial and temporal distribution of polarizing activity: HORNBRUCH AND WOLPERT 725  
*Vgr-1* and *Bone Morphogenetic Protein-4* in mouse neurogenesis: JONES AND OTHERS 531  
development  
retinoic acid receptor beta in chick embryo: SMITH AND EICHELE 245  
*En* proteins in mouse, chick and frog embryos: DAVIS AND OTHERS 287  
newt  
keratin gene expression: FERRETTI AND OTHERS 497  
regeneration-specific homeobox gene in blastema: BROWN AND BROCKES 489  
rat  
NG2 proteoglycan in developing rat limb: NISHIYAMA AND OTHERS 933
- Lineage**  
cell  
bFGF and TGF- $\beta$ 1 influence melanogenesis: STOCKER AND OTHERS 635  
control of cell fate in *C. elegans* by *egl-5*: CHISHOLM 921  
origin of postembryonic neuroblasts: PROKOP AND TECHNAU 79  
positional cues and cell migration in leech: TORRENCE 993
- neural crest  
in chick: FRANK AND SANES 895
- Lithium**  
hatching gland development and relationship to surface ectoderm patterning: DRYSDALE AND ELINSON 469
- Localization**  
cytoplasmic  
in *Xenopus* egg: DANILCHIK AND DENEGRE 845  
of a cytoskeletal protein in ascidian eggs: SWALLA AND OTHERS 425  
storage protein mRNAs in meristems of *Brassica*: FERNANDEZ AND OTHERS 299
- Maize**  
*Teopod2*  
effect on cell lineage: DUDLEY AND POETHIG 733
- Mammal**  
fertilization  
sperm acrosin–zona pellucida interactions: JONES 1155
- Mandibular arch**  
cephalic expression and characterization of *Xenopus En-2*: HEMMATI-BRIVANLOU AND OTHERS 715
- Marker**  
cell autonomous  
analysis of culmination in *Dictyostelium*: JERMYN AND WILLIAMS 779
- Masked mRNA**  
unmasking of stored maternal mRNAs in sea urchins: KELSO-WINEMILLER AND WINKLER 623
- Maternal gene**  
interactions of *giant* with maternal and zygotic genes: ELDON AND PIRROTTA 367
- Maternal morphogen**  
spatial regulation of *giant* during *Drosophila* development: KRAUT AND LEVINE 601
- Maternal mRNA**  
unmasking in sea urchins: KELSO-WINEMILLER AND WINKLER 623
- Matrigel**  
mouse salivary gland branching in transfilter culture: TAKAHASHI AND NOGAWA 327
- Maturation**  
meiotic  
tyrosine phosphorylation of p34<sup>cdc2</sup> and p42: JESSUS AND OTHERS 813  
ovine oocyte  
nuclear–cytoplasmic interaction: SUN AND MOOR 171  
promoting factor  
tyrosine phosphorylation of p34<sup>cdc2</sup> and p42: JESSUS AND OTHERS 813
- Meiotic maturation**  
*Xenopus*  
tyrosine phosphorylation of p34<sup>cdc2</sup> and p42: JESSUS AND OTHERS 813
- Melanocyte**  
bFGF and TGF- $\beta$ 1 influence melanogenesis: STOCKER AND OTHERS 635
- Mesenchymal–epithelial interaction**  
seminal vesicle induction in adult epithelia: CUNHA AND OTHERS 145
- Mesenchyme**  
expression of FGF receptor gene in rat: WANAKA AND OTHERS 455

**Mesoderm**

carbonic anhydrase transcripts in mouse embryos: LYONS AND OTHERS 233

**Formation**

dynamic expression of *snail* in *Drosophila*: ALBERGA AND OTHERS 983

**induction**

single cell analysis in *Xenopus* blastulae: GODSAVE AND SLACK 523

**leech**

positional cues and cell migration: TORRENCE 993

role of *Xwnt-8* in pattern formation in *Xenopus*: CHRISTIAN AND OTHERS 1045

*Xenopus Myf-5*: HOPWOOD AND OTHERS 551

**Methylation****DNA**

imprinting and heritable methylation: SASAKI AND OTHERS 573

**Microtubule**

parthenogenetic mouse embryos produced by inhibition of 1st meiotic cleavage: KUBIAK AND OTHERS 763

**Migration****cell**

and positional cues in leech: TORRENCE 993

proteoglycans in avian neural crest development: PERRIS AND OTHERS 583

sacral neural crest contribution to enteric nervous system: SERBEDZIJIA AND OTHERS 857

T-cadherin expression in avian caudal somite: RANSCHT AND BRONNER-FRASER 15

**nuclear**

mutants affecting F-actin in *Drosophila*: HATANAKA AND OKADA 909

**Mirror-image**

cellular handedness in *Stylonychia*: SHI AND OTHERS 337

**Mis-regulation**

segmentation gene expression in *Drosophila*: PARKHURST AND ISH-HOROWICZ 1121

**Mitogenic activity**

of chorioallantoic fluid related to FGFs: FLAMME AND OTHERS 683

**Molecular cloning**

expression of *AHox1* in *Halocynthia roretzi*: SAIGA AND OTHERS 821

**Monoclonal antibody**

expression of Muller glia specific antigen: SCHLOSSHAUER AND OTHERS 789

nervous-system-specific antigen in grasshopper: SEAVER AND OTHERS 881

**Morphogenetic gradient**

interactions of *giant* with maternal and zygotic genes: ELDON AND PIRROTTA 367

**Morphogenetic mechanism**

cell shape changes in *Drosophila* imaginal leg discs: CONDIC AND OTHERS 23

**Mosaic****mouse ovaries**

XY follicle cells: PALMER AND BURGOYNE 1017

**Motoneuron**

growth factors enhance survival: BLOCH-GALLEGO AND OTHERS 221

**Mouse**

collagen gene differential expression during tooth development: ANDUJAR AND OTHERS 691

**craniofacial development**

collagen type II expression: WOOD AND OTHERS 955

**embryo**

$\alpha$ -actin mRNA and protein in muscle: LYONS AND OTHERS 451

$\alpha 1$ (II) collagen gene expression: CHEAH AND OTHERS 945

carbonic anhydrase transcripts: LYONS AND OTHERS 233

developmental expression of syndecan: TRAUTMAN AND OTHERS 213

early expression of myogenic factor, *myf-5*: OTT AND OTHERS 1097

embryonic stem cell from 413.d mutants: CONLON AND OTHERS 969

endodermal origin of yolk-sac-derived teratomas: SOBIS AND OTHERS 75

*En* proteins in mouse, chick and frog embryos: DAVIS AND OTHERS 287

*Evi-1* expression: PERKINS AND OTHERS 479

expression of TGF  $\beta$  genes: SCHMID AND OTHERS 117

H $\beta$ 58, an insertional mutation: RADICE AND OTHERS 801

IGF-2 receptors: HARVEY AND KAYE 1057

retinoic acid receptors and retinol binding proteins: RUBERTE AND OTHERS 45

sacral neural crest contribution to enteric nervous system: SERBEDZIJIA AND OTHERS 857

TGF  $\beta$  gene expression in mouse embryos: MILLAN AND OTHERS 131

*v-src* expression in chimeric mice: BOULTER AND OTHERS 357

**fetuses**

parental origin and survival of XO fetuses: HUNT 1137

**genes**

*labial*-like genes, *Hox 1.6* and *Hox 2.9*: MURPHY AND HILL 61

**hair**

TIMP localization: KAWABE AND OTHERS 877

**mosaic ovary**

XY follicle cells: PALMER AND BURGOYNE 1017

**oocyte**

parthenogenetic embryos produced by inhibition of 1st meiotic cleavage: KUBIAK AND OTHERS 763

**salivary gland**

branching in transfilter culture: TAKAHASHI AND NOGAWA 327

**seminal vesicle**

induction in adult epithelia: CUNHA AND OTHERS 145

**skin**

*c-fos* expression during keratinization: FISHER AND OTHERS 253

**t-complex**

isolation of testis-specific gene from distal inversion: MAZARAKIS AND OTHERS 561

**tooth development**

*Hox 7.1* expression: MACKENZIE AND OTHERS 269

**transgenic**

imprinting and heritable methylation: SASAKI AND OTHERS 573

paternal expression of *Pgk-1*: PRAVTCHEVA AND OTHERS 1109

**Muller glia**

expression of specific antigen after optic nerve lesion: SCHLOSSHAUER AND OTHERS 789

**Multiple prestalk cell types**

analysis of culmination in *Dictyostelium*: JERMYN AND WILLIAMS 779

**mup-1*****C. elegans***

embryonic body wall muscle attachments: GOH AND BOGAERT 667

**Muscle**

- attachment pattern
  - mup-1* gene effect in *C. elegans*: GOH AND BOGAERT 667
- mouse
  - $\alpha$ -actin mRNA and protein: LYONS AND OTHERS 451
- skeletal
  - carbonic anhydrase transcripts in mouse embryos: LYONS AND OTHERS 233
  - early expression of myogenic factor, *myf-5*: OTT AND OTHERS 1097
- Xenopus Myf-5*: HOPWOOD AND OTHERS 551

**Mutant**

- affecting F-actin in *Drosophila*: HATANAKA AND OKADA 909
- control of cell fate in *C. elegans* by *egl-5*: CHISHOLM 921

**Mutation**

- embryonic stem cells from 413.d mutant mouse embryos: CONLON AND OTHERS 969
- H $\beta$ 58
  - in mouse embryo: RADICE AND OTHERS 801
- heterochronic
  - Teopod2*, effect on cell lineage of maize shoot: DUDLEY AND POETHIG 733

**Myelination**

- development of oligodendroglial progenitors in rat forebrain: HARDY AND REYNOLDS 1061

**Myeloid leukemogenesis**

- Evi-1* expression in mouse development: PERKINS AND OTHERS 479

***myf-5***

- early expression in mouse embryo: OTT AND OTHERS 1097

**Myogenesis**

- FGF mRNAs downregulated during myogenic differentiation: MOORE AND OTHERS 741
- mouse
  - early expression of myogenic factor, *myf-5*: OTT AND OTHERS 1097
- Xenopus Myf-5*: HOPWOOD AND OTHERS 551

**Myoplasm**

- localization of a cytoskeletal protein in ascidian eggs: SWALLA AND OTHERS 425

**Myosin**

- cytoplasmic
  - in *Drosophila* development: YOUNG AND OTHERS 1

**Myotome**

- $\alpha$ -actin mRNA and protein in mouse embryonic muscle: LYONS AND OTHERS 451

**Napin**

- storage protein mRNAs in meristems of *Brassica*: FERNANDEZ AND OTHERS 299

**Nasal placode**

- gap junctions in chick facial primordia and brain: MINKOFF AND OTHERS 509

**Nerve**

- lesion
  - expression of Muller glia specific antigen: SCHLOSSHAUER AND OTHERS 789

**Nervous system**

- enteric
  - colonization of post-umbilical bowel by sacral neural crest: POMERANZ AND OTHERS 647
- expression of FGF receptor gene in rat: WANAKA AND OTHERS 455
- peripheral
  - sense organs on *Drosophila* wing disc: HUANG AND OTHERS 1087

**Neural crest**

- bFGF and TGF- $\beta$ 1 influence melanogenesis: STOCKER AND OTHERS 635
- chick
  - contribution to enteric nervous system: SERBEDZIJA AND OTHERS 857
  - lineage analysis: FRANK AND SANES 895
  - RXR nuclear receptor expressed in neural-crest-derived cells of PNS: ROWE AND OTHERS 771
- collagen type II expression in mouse craniofacial development: WOOD AND OTHERS 955
- CRABP and rhombomeres: MADEN AND OTHERS 35
- Hox 7.1* expression in tooth development: MACKENZIE AND OTHERS 269
- mouse
  - contribution to enteric nervous system: SERBEDZIJA AND OTHERS 857
- proteoglycans in avian development: PERRIS AND OTHERS 583
- sacral
  - colonization of post-umbilical bowel: POMERANZ AND OTHERS 647
- trunk
  - T-cadherin expression in avian caudal somite: RANSCHT AND BRONNER-FRASER 15

**Neural tube**

- CRABP, rhombomeres and neural crest: MADEN AND OTHERS 35

**Neuroblast**

- origin of in postembryonic *Drosophila*: PROKOP AND TECHNAU 79

**Neurogenesis**

- $\alpha$ 1(II) collagen gene expression in mouse: CHEAH AND OTHERS 945

***Drosophila***

- origin of postembryonic neuroblasts: PROKOP AND TECHNAU 79

**leech**

- positional cues and cell migration: TORRENCE 993
- sense organs on wing disc in *Drosophila*: HUANG AND OTHERS 1087
- Vgr-1* and *Bone Morphogenetic Protein-4* in mouse: JONES AND OTHERS 531

**Neuron**

- chick
  - neural crest lineage: FRANK AND SANES 895
  - expression of aFGF gene during chick neural development: SCHNÜRCH AND RISAU 1143

**Neurotrophic factor**

- muscle enhances motoneuron survival: BLOCH-GALLEGO AND OTHERS 221

**Neurulation**

- Xenopus* hatching gland development and relationship to surface ectoderm patterning: DRYSDALE AND ELINSON 469

**Newt**

- limb
  - keratin gene expression: FERRETTI AND OTHERS 497

**NG2**

- proteoglycan
  - in developing rat limb: NISHIYAMA AND OTHERS 933

**Non-muscle**

- myosin
  - in *Drosophila* development: YOUNG AND OTHERS 1

**Northern blot**

- expression of TGF  $\beta$  genes in mouse embryogenesis: SCHMID AND OTHERS 117

**Notochord**

carbonic anhydrase transcripts in mouse embryos: LYONS AND OTHERS 233

**Nuclear–cytoplasmic interaction**

in ovine oocyte maturation: SUN AND MOOR 171

**Nuclear membrane**

roles of centrosomes and DNA in organizing cytoskeleton: YASUDA AND OTHERS 379

**Nuclear migration**

mutants affecting F-actin in *Drosophila*: HATANAKA AND OKADA 909

**Nuclear oncogene**

expression  
and cell proliferation during feather morphogenesis: DESBIENS AND OTHERS 699

**NvHbox 2**

homeobox gene in newt limb blastema: BROWN AND BROCKES 489

**Odontoblast**

differentiation in mouse: ANDUJAR AND OTHERS 691

**Oligodendroglia**

development of progenitors in rat forebrain: HARDY AND REYNOLDS 1061

**Oocyte**

mouse

parthenogenetic embryos produced by inhibition of 1st meiotic cleavage: KUBIAK AND OTHERS 763

ovine

nuclear–cytoplasmic interaction in maturation: SUN AND MOOR 171

*Xenopus*

tyrosine phosphorylation of p34<sup>cdc2</sup> and p42: JESSUS AND OTHERS 813

**Optic nerve**

lesion

expression of Muller glia specific antigen: SCHLOSSHAUER AND OTHERS 789

**Optic tectum**

cephalic expression and characterization of *Xenopus En-2*: HEMMATI-BRIVANLOU AND OTHERS 715

**Organogenesis**

*Vgr-1* and *Bone Morphogenetic Protein-4* in mouse neurogenesis: JONES AND OTHERS 531

**Ovary**

mouse

XY follicle cells in mosaic ovaries: PALMER AND BURGOYNE 1017

**Overhead light**

analysis of culmination in *Dictyostelium*: JERMYN AND WILLIAMS 779

**Ovine**

oocyte

nuclear–cytoplasmic interaction in maturation: SUN AND MOOR 171

**Oxadaic acid**

tyrosine phosphorylation in *Xenopus* oocyte: JESSUS AND OTHERS 813

**p34<sup>cdc2</sup>**

tyrosine phosphorylation in *Xenopus* oocyte: JESSUS AND OTHERS 813

**p42**

tyrosine phosphorylation in *Xenopus* oocyte: JESSUS AND OTHERS 813

**Pair-rule**

genes

mis-regulating segmentation gene expression in *Drosophila*: PARKHURST AND ISH-HOROWICZ 1121

**Parasegment**

control of *abd-A* and *Abd-B* expression: SÁNCHEZ-HERRERO 437

**Parental origin**

and survival of XO mouse fetuses: HUNT 1137

**Parthenogenesis**

mouse

embryos produced by inhibition of 1st meiotic cleavage with cytochalasin D: KUBIAK AND OTHERS 763

**Pathfinding**

nervous-system-specific antigen in grasshopper: SEAVER AND OTHERS 881

**Pattern**

dorsal–ventral

*Toll* protein in *Drosophila* embryo: HASHIMOTO AND OTHERS 1021

formation

cellular handedness in *Stylonychia*: SHI AND OTHERS 337

*En* proteins in mouse, chick and frog embryos: DAVIS AND OTHERS 287

inducing factors and bird embryogenesis: COOKE AND WONG 197

interactions of *giant* with maternal and zygotic genes: ELDON AND PIRROTTA 367

mis-regulating segmentation gene expression in *Drosophila*: PARKHURST AND ISH-HOROWICZ 1121

retinoic acid receptor beta in chick embryo: SMITH AND EICHELE 245

role of *Xwnu-8* in *Xenopus*: CHRISTIAN AND OTHERS 1045

sense organs on wing disc in *Drosophila*: HUANG AND OTHERS 1087

of embryonic body wall muscle attachments in *C. elegans*: GOH AND BOGAERT 667

**Pattern formation**

interaction of *armadillo* with *wingless* in *Drosophila*:

PEIFER AND OTHERS 1029

**Peripheral nervous system**

chick

RXR nuclear receptor expressed in neural-crest-derived cells: ROWE AND OTHERS 771

*Drosophila*

sense organs on wing disc: HUANG AND OTHERS 1087

sensillum development requires *Hairless*: BANG AND OTHERS 89

**Pgk-1**

paternal expression in transgenic mice embryos:

PRAVTCHEVA AND OTHERS 1109

**Phenocopy**

mutants affecting F-actin in *Drosophila*: HATANAKA AND OKADA 909

**Phosphoglycerate kinase-1**

paternal expression in transgenic mice: PRAVTCHEVA AND OTHERS 1109

**Phosphorylation**

tyrosine

in *Xenopus* oocyte: JESSUS AND OTHERS 813

**Pig**

fertilization

proacrosin binding to the zona pellucida: URCH AND PATEL 1165

sperm acrosin–zona pellucida interactions: JONES 1155

- Pituitary**  
 cephalic expression and characterization of *Xenopus En-2*:  
 HEMMATI-BRIVANLOU AND OTHERS 715  
*Vgr-1* and *Bone Morphogenetic Protein-4* in mouse  
 neurogenesis: JONES AND OTHERS 531
- Placode**  
 collagen type II expression in mouse craniofacial  
 development: WOOD AND OTHERS 955
- Plasma membrane**  
*Toll* protein in *Drosophila* embryo: HASHIMOTO AND  
 OTHERS 1021
- Polarity**  
 cell  
 differential expression of cadherins in *Xenopus*: ANGRES  
 AND OTHERS 829
- Polarizing activity**  
 chick embryo  
 spatial and temporal distribution: HORNBRUCH AND  
 WOLPERT 725
- Polarizing region**  
 spatial and temporal distribution of activity: HORNBRUCH  
 AND WOLPERT 725
- Positional cue**  
 and cell migration in leech: TORRENCE 993
- Positional information**  
 cellular handedness in *Stylynychia*: SHI AND OTHERS 337  
*NvHbox 2* homeobox gene in newt limb blastema: BROWN  
 AND BROCKES 489
- Postimplantation**  
 development in mouse  
 H $\beta$ 58, an insertional mutation: RADICE AND OTHERS 801
- Post-umbilical bowel**  
 colonization by sacral neural crest: POMERANZ AND OTHERS  
 647
- Preimplantation embryo**  
 IGF-2 receptors in mouse development: HARVEY AND KAYE  
 1057
- Prenatal mortality**  
 parental origin and survival of XO mouse fetuses: HUNT  
 1137
- Prestalk**  
 multiple cell types  
 analysis of culmination in *Dictyostelium*: JERMYN AND  
 WILLIAMS 779
- Primary palate**  
 gap junctions in chick facial primordia and brain: MINKOFF  
 AND OTHERS 509
- Primitive erythropoiesis**  
 of teratocarcinoma stem cells: MIWA AND OTHERS 543
- Primitive streak**  
 inducing factors and bird embryogenesis: COOKE AND WONG  
 197
- Proacrosin**  
 sperm acrosin–zona pellucida interactions: JONES 1155
- Progenitor**  
 development of oligodendroglial progenitors in rat  
 forebrain: HARDY AND REYNOLDS 1061
- Proliferation**  
 cell  
 and transcription of nuclear oncogenes during feather  
 morphogenesis: DESBIENS AND OTHERS 699
- Protein**  
*c-fos* expression during keratinization: FISHER AND OTHERS  
 253  
 finger  
 dynamic expression of *snail* in *Drosophila*: ALBERGA  
 AND OTHERS 983
- gap junction  
 in chick facial primordia and brain: MINKOFF AND OTHERS  
 509
- growth factor  
 inducing factors and bird embryogenesis: COOKE AND  
 WONG 197
- helix-loop-helix  
*Xenopus Myf-5*: HOPWOOD AND OTHERS 551
- lens-specific  
 $\delta$  crystallin and argininosuccinate lyase expression: DE  
 POMERAI AND OTHERS 181
- localization of a cytoskeletal protein in ascidian eggs:  
 SWALLA AND OTHERS 425
- secretory  
 seminal vesicle induction in adult epithelia: CUNHA AND  
 OTHERS 145
- Serrate**  
 encodes EGF-like transmembrane protein in  
*Drosophila*: THOMAS AND OTHERS 749
- synthesis  
 nuclear–cytoplasmic interaction in ovine oocyte  
 maturation: SUN AND MOOR 171  
 unmasking of stored maternal mRNAs in sea urchins:  
 KELSO-WINEMILLER AND WINKLER 623
- zinc-finger  
*Evi-1* expression in mouse development: PERKINS AND  
 OTHERS 479
- Proteoglycan**  
 heparan and chondroitin sulphate  
 developmental expression of syndecan: TRAUTMAN AND  
 OTHERS 213  
 in avian neural crest development: PERRIS AND OTHERS 583  
 NG2  
 in developing rat limb: NISHIYAMA AND OTHERS 933
- Proto-oncogene**  
*c-fos* expression during keratinization: FISHER AND OTHERS  
 253  
*Evi-1* expression in mouse development: PERKINS AND  
 OTHERS 479
- Quail**  
 –chick chimaera  
 avian endocardial assembly: NODEN 867  
 embryo  
 bFGF and TGF- $\beta$ 1 influence melanogenesis: STOCKER  
 AND OTHERS 635
- Rapeseed**  
 storage protein mRNAs in meristems of *Brassica*:  
 FERNANDEZ AND OTHERS 299
- RAR- $\alpha$**   
 and retinol binding proteins: RUBERTE AND OTHERS 45
- RAR- $\beta$**   
 and retinol binding proteins: RUBERTE AND OTHERS 45  
 gene expression in chick face development: ROWE AND  
 OTHERS 1007
- RAR- $\gamma$**   
 and retinol binding proteins: RUBERTE AND OTHERS 45
- Rat**  
 development  
 expression of FGF receptor gene: WANAKA AND OTHERS  
 455  
 fetus  
 IGF-I and IGF-II mRNA in brain: AYER-LE LIEVRE AND  
 OTHERS 105  
 forebrain  
 development of oligodendroglial progenitors: HARDY  
 AND REYNOLDS 1061

- limb  
 NG2 proteoglycan in developing rat limb: NISHIYAMA AND OTHERS 933
- seminal vesicle  
 induction in adult epithelia: CUNHA AND OTHERS 145
- skin  
*c-fos* expression during keratinization: FISHER AND OTHERS 253
- vitamin A-deficient  
 regulation of TGF  $\beta$  expression by retinoic acid: GLICK AND OTHERS: 1081
- Receptor**  
 androgen  
 seminal vesicle induction in adult epithelia: CUNHA AND OTHERS 145
- FGF  
 mRNAs downregulated during myogenic differentiation: MOORE AND OTHERS 741
- IGF-2  
 in mouse development: HARVEY AND KAYE 1057
- retinoic acid  
 expressed in neural-crest-derived cells of chick PNS: ROWE AND OTHERS 771
- Regeneration**  
 limb  
 keratin gene expression in the newt: FERRETTI AND OTHERS 497  
*NvHbox 2* homeobox gene in newt limb blastema: BROWN AND BROCKES 489
- Regional specification**  
 control of cell fate in *C. elegans* by *egl-5*: CHISHOLM 921
- Regulation**  
 cell shape  
 in *Drosophila* imaginal leg discs: CONDIC AND OTHERS 23
- cis*  
 imaginal disk expression of *decapentaplegic* in *Drosophila*: BLACKMAN AND OTHERS 657
- developmental  
*Xenopus* homeobox gene expression: SU AND OTHERS 1179
- Regulatory gene**  
 early expression of myogenic factor, *myf-5*: OTT AND OTHERS 1097
- Retina**  
 $\delta$  crystallin and argininosuccinate lyase expression: POMERAI AND OTHERS 181  
 expression of Muller glia specific antigen: SCHLOSSHAUER AND OTHERS 789  
 gap junctions in chick facial primordia and brain: MINKOFF AND OTHERS 509
- Retinoic acid**  
 CRABP, rhombomeres and neural crest: MADEN AND OTHERS 35  
 hatching gland development and relationship to surface ectoderm patterning: DRYSDALE AND ELINSON 469  
 keratin gene expression in the newt limb: FERRETTI AND OTHERS 497  
*NvHbox 2* homeobox gene in newt limb blastema: BROWN AND BROCKES 489
- receptor  
 and retinol binding proteins: RUBERTE AND OTHERS 45  
 receptor beta in chick embryo: SMITH AND EICHELE 245  
 regulation of TGF  $\beta$  expression in vitamin A-deficient rat: GLICK AND OTHERS: 1081
- Retinoic acid receptor**  
 expressed in neural-crest-derived cells of chick PNS: ROWE AND OTHERS 771
- Retinoic acid receptor beta**  
 in chick embryo: SMITH AND EICHELE 245
- Retinoic acid receptor- $\beta$  (RAR- $\beta$ )**  
 gene expression in chick face development: ROWE AND OTHERS 1007
- Retrovirus**  
 colonization of post-umbilical bowel by sacral neural crest: POMERANZ AND OTHERS 647  
 fate of embryonic stem cells from 413.d mutant mouse embryos: CONLON AND OTHERS 969  
 neural crest lineage in chick: FRANK AND SANES 895
- Rhombomere**  
 CRABP and neural crest: MADEN AND OTHERS 35  
*labial*-like genes in mouse: MURPHY AND HILL 61
- RNA**  
 messenger  
 and  $\alpha$ -actin protein in mouse embryonic muscle: LYONS AND OTHERS 451  
 expression of IGF-I and IGF-II in the rat fetus: AYER-LE LIEVRE AND OTHERS 105  
*in vivo* depletion of cyclin B mRNA: WEEKS AND OTHERS 1173  
 storage protein mRNAs in meristems of *Brassica*: FERNANDEZ AND OTHERS 299  
 unmasking of stored maternal mRNAs in sea urchins: KELSO-WINEMILLER AND WINKLER 623
- RXR**  
 expressed in neural-crest-derived cells of chick PNS: ROWE AND OTHERS 771
- Sacral neural crest**  
 colonization of post-umbilical bowel: POMERANZ AND OTHERS 647
- Salivary gland**  
 mouse  
 branching in transfilter culture: TAKAHASHI AND NOGAWA 327
- Sarcomeric actin**  
 $\alpha$ -actin mRNA and protein in mouse embryonic muscle: LYONS AND OTHERS 451
- Scanning electron microscopy**  
*En* proteins in mouse, chick and frog embryos: DAVIS AND OTHERS 287
- Schwann cell**  
 bFGF and TGF- $\beta$ 1 influence melanogenesis: STOCKER AND OTHERS 635
- Sclerotome**  
 chick  
 T-cadherin expression in avian caudal somite: RANSCHT AND BRONNER-FRASER 15
- Sea urchin**  
 eggs  
 unmasking of stored maternal mRNAs in sea urchins: KELSO-WINEMILLER AND WINKLER 623
- Secretory protein**  
 seminal vesicle induction in adult epithelia: CUNHA AND OTHERS 145
- Seed**  
 development  
 storage protein mRNAs in meristems of *Brassica*: FERNANDEZ AND OTHERS 299
- Segment**  
 polarity gene  
 interaction of *armadillo* with *wingless* in *Drosophila*: PEIFER AND OTHERS 1029

**Segmentation***Drosophila*

interactions of *giant* with maternal and zygotic genes:  
ELDON AND PIRROTTA 367

## gene expression

mis-regulation in *Drosophila*: PARKHURST AND ISH-  
HOROWICZ 1121

## hindbrain

*labial*-like genes in mouse: MURPHY AND HILL 61

interactions between *giant* and *Kruppel* in *Drosophila*:

KRAUT AND LEVINE 611

spatial regulation of *giant* during *Drosophila* development:

KRAUT AND LEVINE 601

**Selective cell ablation**

positional cues and cell migration in leech: TORRENCE 993

**Seminal vesicle**

induction in adult epithelia: CUNHA AND OTHERS 145

## secretory proteins

induction in adult epithelia: CUNHA AND OTHERS 145

**Sensillum**

## development

requires *Hairless* in *Drosophila*: BANG AND OTHERS 89

**Sensory ganglia**

## chick

neural crest lineage: FRANK AND SANES 895

**Sensory mother cell**

sense organs on wing disc in *Drosophila*: HUANG AND  
OTHERS 1087

**Serrate***Drosophila*

encodes EGF-like transmembrane protein: THOMAS AND  
OTHERS 749

**Serum**

## -free culture

of teratocarcinoma stem cells: MIWA AND OTHERS 543

**Signalling**

## pathway

interaction of *armadillo* with *wingless* in *Drosophila*:  
PEIFER AND OTHERS 1029

## transmembrane

*Toll* protein in *Drosophila* embryo: HASHIMOTO AND  
OTHERS 1021

**Skeletal muscle**

carbonic anhydrase transcripts in mouse embryos: LYONS  
AND OTHERS 233

## mouse

early expression of myogenic factor, *myf-5*: OTT AND  
OTHERS 1097

**Skeletal myocyte**

FGF mRNAs downregulated during myogenic  
differentiation: MOORE AND OTHERS 741

**snail (sna)**

dynamic expression in *Drosophila*: ALBERGA AND OTHERS  
983

**Somite**

## caudal

T-cadherin expression in avian embryo: RANSCHT AND  
BRONNER-FRASER 15

*En* proteins in mouse, chick and frog embryos: DAVIS AND  
OTHERS 287

**Specification**

## regional

control of cell fate in *C. elegans* by *egl-5*: CHISHOLM 921

**Spindle**

parthenogenetic mouse embryos produced by inhibition of  
1st meiotic cleavage: KUBIAK AND OTHERS 763

**Stalk-specific cell marker**

analysis of culmination in *Dictyostelium*: JERMYN AND  
WILLIAMS 779

**Stem**

## cells

primitive erythropoiesis: MIWA AND OTHERS 543

**Stylonychia mytilus**

cellular handedness: SHI AND OTHERS 337

**Sulphate**

## binding

sperm acrosin-zona pellucida interactions: JONES 1155

**Surface**

## ectoderm

hatching gland development: DRYSDALE AND ELINSON 469

**Syndecan**

expression in mouse embryo: TRAUTMAN AND OTHERS 213

**Synthesis**

## protein

nuclear-cytoplasmic interaction in ovine oocyte

maturation: SUN AND MOOR 171

unmasking of stored maternal mRNAs in sea urchins:

KELSO-WINEMILLER AND WINKLER 623

**t-complex**

isolation of testis-specific gene from distal inversion:

MAZARAKIS AND OTHERS 561

**Teopod2**

effect on cell lineage of maize shoot: DUDLEY AND POETHIG  
733

**Teratocarcinoma**

## stem cells

primitive erythropoiesis: MIWA AND OTHERS 543

**Teratoma**

endodermal origin of yolk-sac-derived teratomas: SOBIS

AND OTHERS 75

**Testis-specific**

## gene

isolation from distal inversion of the mouse *t*-complex:

MAZARAKIS AND OTHERS 561

**TGF  $\beta$** 

gene expression in mouse embryos: MILLAN AND OTHERS  
131

genes in mouse embryogenesis: SCHMID AND OTHERS 117

inducing factors and bird embryogenesis: COOKE AND WONG  
197

regulation by retinoic acid in vitamin A-deficient rat:

GLICK AND OTHERS 1081

## superfamily

imaginal disk expression of *decapentaplegic* in

*Drosophila*: BLACKMAN AND OTHERS 657

*Vgr-1* and *Bone Morphogenetic Protein-4* in mouse

neurogenesis: JONES AND OTHERS 531

**TGF- $\beta$ 1**

and bFGF influence melanogenesis: STOCKER AND OTHERS

635

**Tibiotarsus**

## chick

mRNA and protein: LINSENMAYER AND OTHERS 191

**TIMP (See tissue inhibitor of metalloproteinase)****Tissue inhibitor of metalloproteinase**

localization in cycling mouse hair: KAWABE AND OTHERS 877

**Toll**

## protein

in *Drosophila* embryo: HASHIMOTO AND OTHERS 1021

**Tooth**

- development in mouse – expression of collagen genes: ANDUJAR AND OTHERS 6
- Hox 7.1* expression during development: MACKENZIE AND OTHERS 269

**Transcription**

- factors
  - Evi-1* expression in mouse development: PERKINS AND OTHERS 479
- nuclear oncogenes
  - and cell proliferation during feather morphogenesis: DESBIENS AND OTHERS 699

**Transcriptional regulation**

- upstream control region of *Ultrabithorax*: IRVINE AND OTHERS 407

**Transdifferentiation**

- $\delta$  crystallin and argininosuccinate lyase expression: DE POMERAI AND OTHERS 181
- endodermal origin of yolk-sac-derived teratomas: SOBIS AND OTHERS 75

**Transfilter culture**

- mouse salivary gland branching in transfilter culture: TAKAHASHI AND NOGAWA 327
- mouse salivary gland branching: TAKAHASHI AND NOGAWA 327

**Transforming growth factor beta**

- and bFGF influence melanogenesis: STOCKER AND OTHERS 635
- expression of genes in mouse embryogenesis: SCHMID AND OTHERS 117
- gene expression in mouse embryos: MILLAN AND OTHERS 131
- inducing factors and bird embryogenesis: COOKE AND WONG 197
- regulation by retinoic acid in vitamin A-deficient rat: GLICK AND OTHERS 1081
- Vgr-1* and *Bone Morphogenetic Protein-4* in mouse neurogenesis: JONES AND OTHERS 531

**Transgene**

- mouse
  - paternal expression of *Pgk-1*: PRAVTCHEVA AND OTHERS 1109

**Transgenic mouse**

- imprinting and heritable methylation: SASAKI AND OTHERS 573
- TIMP localization in cycling mouse hair: KAWABE AND OTHERS 877

**Translational control**

- unmasking of stored maternal mRNAs in sea urchins: KELSO-WINEMILLER AND WINKLER 623

**Transmembrane protein**

- Drosophila Serrate* encodes EGF-like transmembrane protein: THOMAS AND OTHERS 749

**Transmembrane signalling**

- Toll* protein in *Drosophila* embryo: HASHIMOTO AND OTHERS 1021

**Trunk**

- neural crest cell migration
  - T-cadherin expression in avian caudal somite: RANSCHT AND BRONNER-FRASER 15

**Twinning**

- v-src* expression in chimeric mice: BOULTER AND OTHERS 357

**Tyrosine**

- phosphorylation
  - in *Xenopus* oocyte: JESSUS AND OTHERS 813

**UV irradiation**

- hatching gland development and relationship to surface ectoderm patterning: DRYSDALE AND ELINSON 469

**Vesicle**

- seminal
  - induction in adult epithelia: CUNHA AND OTHERS 145

**Vgr-1**

- and *Bone Morphogenetic Protein-4* in mouse neurogenesis: JONES AND OTHERS 531

**Vitamin A**

- deficiency
  - regulation of TGF  $\beta$  expression by retinoic acid: GLICK AND OTHERS: 1081

**v-src**

- expression in chimeric mice: BOULTER AND OTHERS 357

**Wing**

- bud
  - spatial and temporal distribution of polarizing activity: HORNBRUCH AND WOLPERT 725
- disc
  - sense organs in *Drosophila*: HUANG AND OTHERS 1087
- Drosophila*
  - encodes EGF-like transmembrane protein: THOMAS AND OTHERS 749

**wingless**

- interaction with *armadillo* in *Drosophila*: PEIFER AND OTHERS 1029

**Wnt-1**

- role of *Xwnt-8* in pattern formation in *Xenopus*: CHRISTIAN AND OTHERS 1045

**X chromosome**

- mouse
  - parental origin and survival of XO fetuses: HUNT 1137

**Xenopus**

- blastula
  - single cell analysis of mesoderm formation: GODSAVE AND SLACK 523
- cadherins
  - differential expression: ANGRES AND OTHERS 829
- egg
  - cytoplasmic movements: DANILCHIK AND DENEGRE 845
- eggs and embryos
  - EP-cadherin expression: GINSBERG AND OTHERS 315
- embryo
  - E-cadherin distribution: LEVI AND OTHERS 159
  - homeobox gene expression: SU AND OTHERS 1179
  - inducing factors and bird embryogenesis: COOKE AND WONG 197
  - in vivo* depletion of cyclin B mRNA: WEEKS AND OTHERS 1173
  - Myf-5*: HOPWOOD AND OTHERS 551
  - role of *Xwnt-8* in pattern formation: CHRISTIAN AND OTHERS 1045

**En-2**

- cephalic expression and characterization: HEMMATI-BRIVANLOU AND OTHERS 715

- En* proteins in mouse, chick and frog embryos: DAVIS AND OTHERS 287

**hatching gland**

- development and relationship to surface ectoderm patterning: DRYSDALE AND ELINSON 469



oocyte  
  tyrosine phosphorylation of p34<sup>cdc2</sup> and p42: JESSUS AND  
  OTHERS 813  
**Xhox-7.1**  
  *Xenopus* homeobox gene expression: SU AND OTHERS 1179  
**XO**  
  mouse fetuses  
  parental origin and survival: HUNT 1137  
**Xwnt-8**  
  role in pattern formation in *Xenopus*: CHRISTIAN AND  
  OTHERS 1045  
**XY**  
  follicle cells in mouse mosaic ovaries: PALMER AND  
  BURGOYNE 1017

**Yolk sac**  
  mouse  
  endodermal origin of yolk-sac-derived teratomas: SOBIS  
  AND OTHERS 75  
**Zinc-finger**  
  protein  
  *Evi-1* expression in mouse development: PERKINS AND  
  OTHERS 479  
**Zona pellucida**  
  proacrosin binding: URCH AND PATEL 1165  
  -sperm acrosin interactions: JONES 1155  
**Zygotic gene**  
  interactions of *giant* with maternal and zygotic genes:  
  ELDON AND PIRROTTA 367.
